# Supplementary material for: The proportion and effect of corticosteroid therapy in patients with COVID-19 infection: A systematic review and meta-analysis
Source: PubMed Central journal article supplement (PMC8059814; doi:10.1371/journal.pone.0249481), 2021-04-21

# A

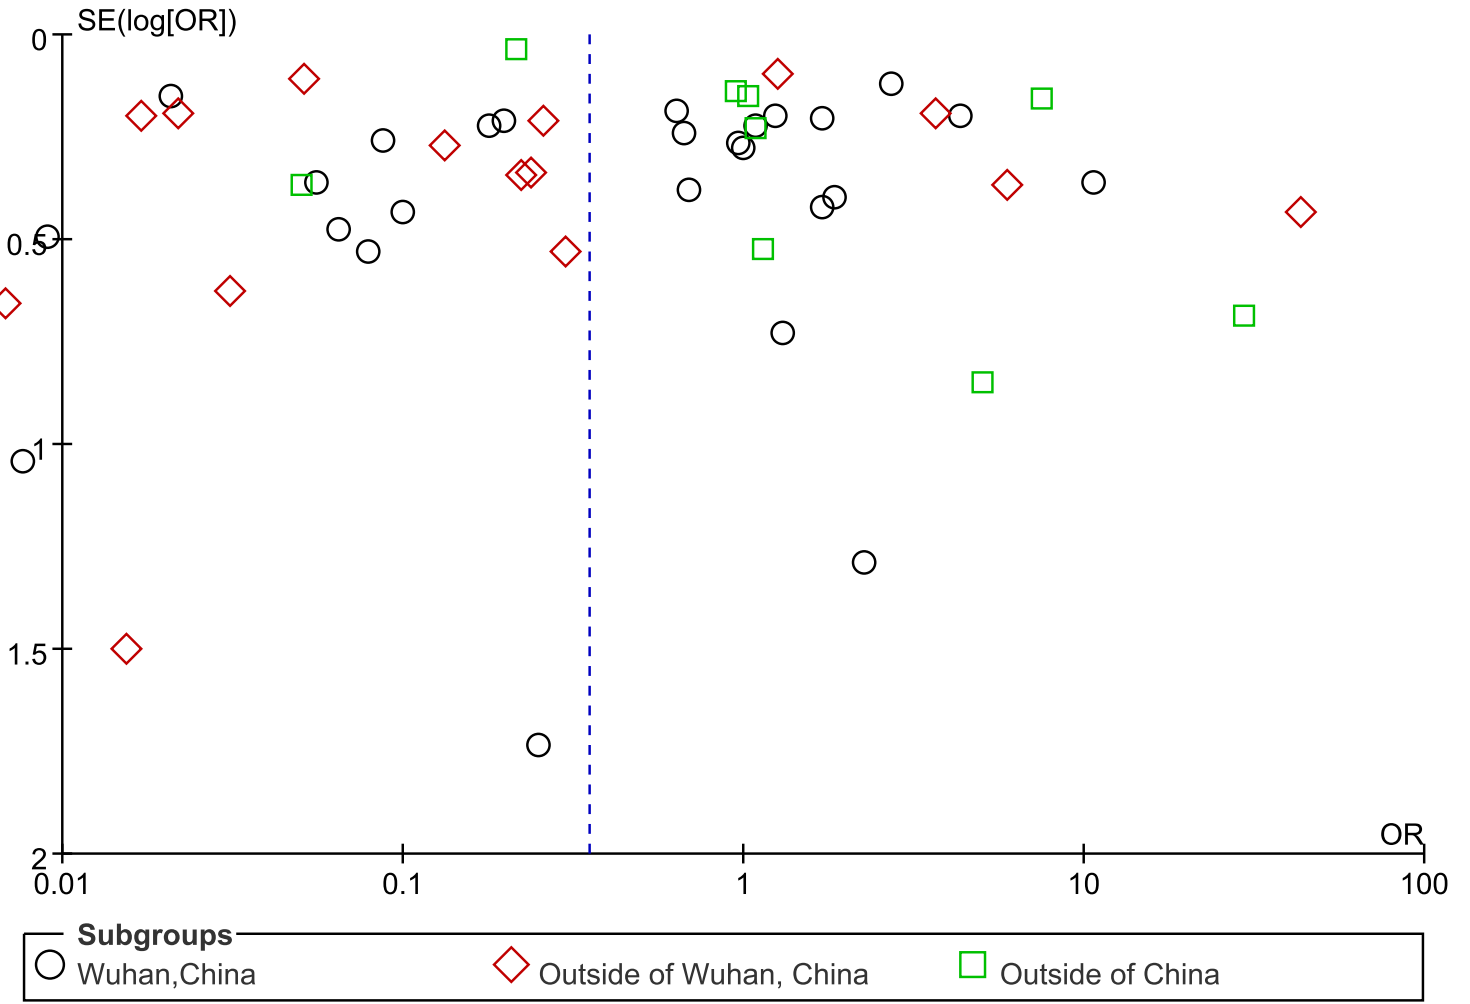

# B

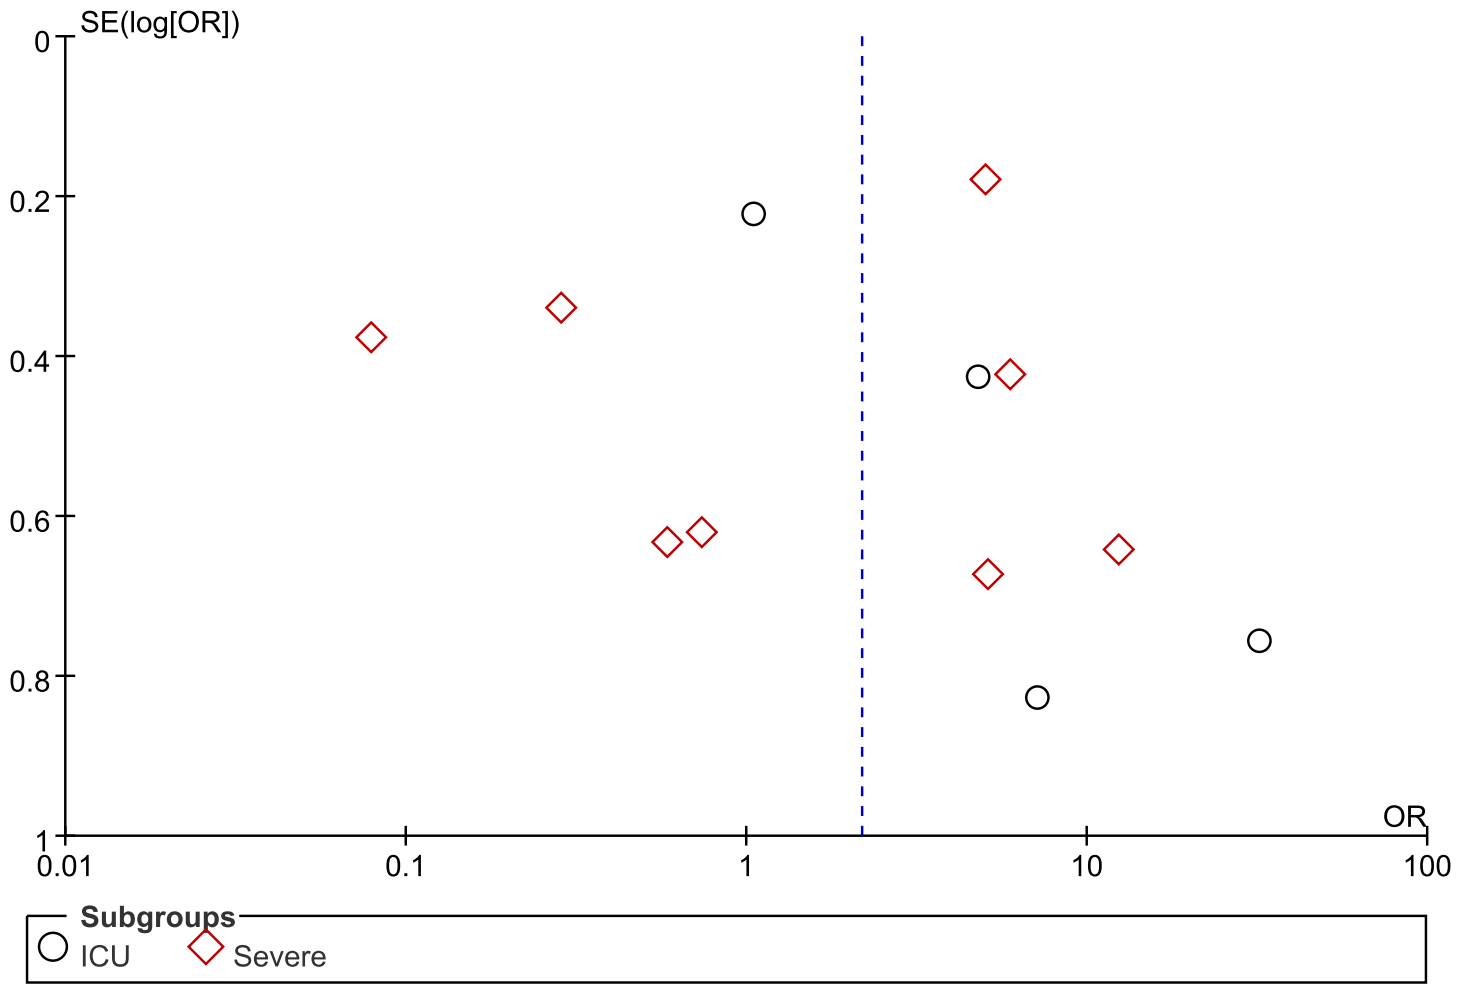

**C**

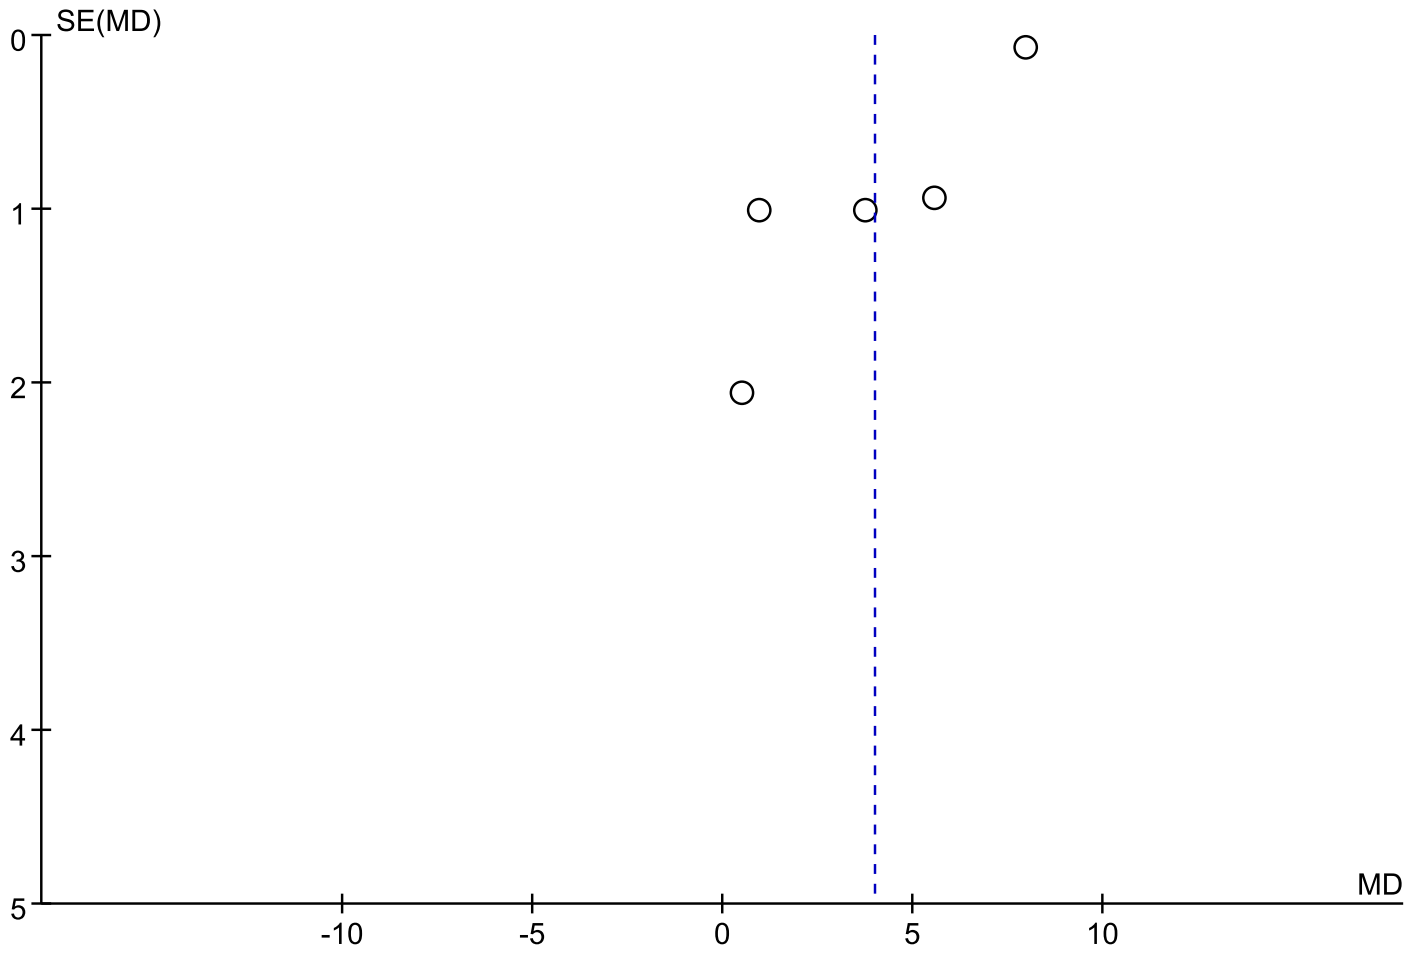

**D**

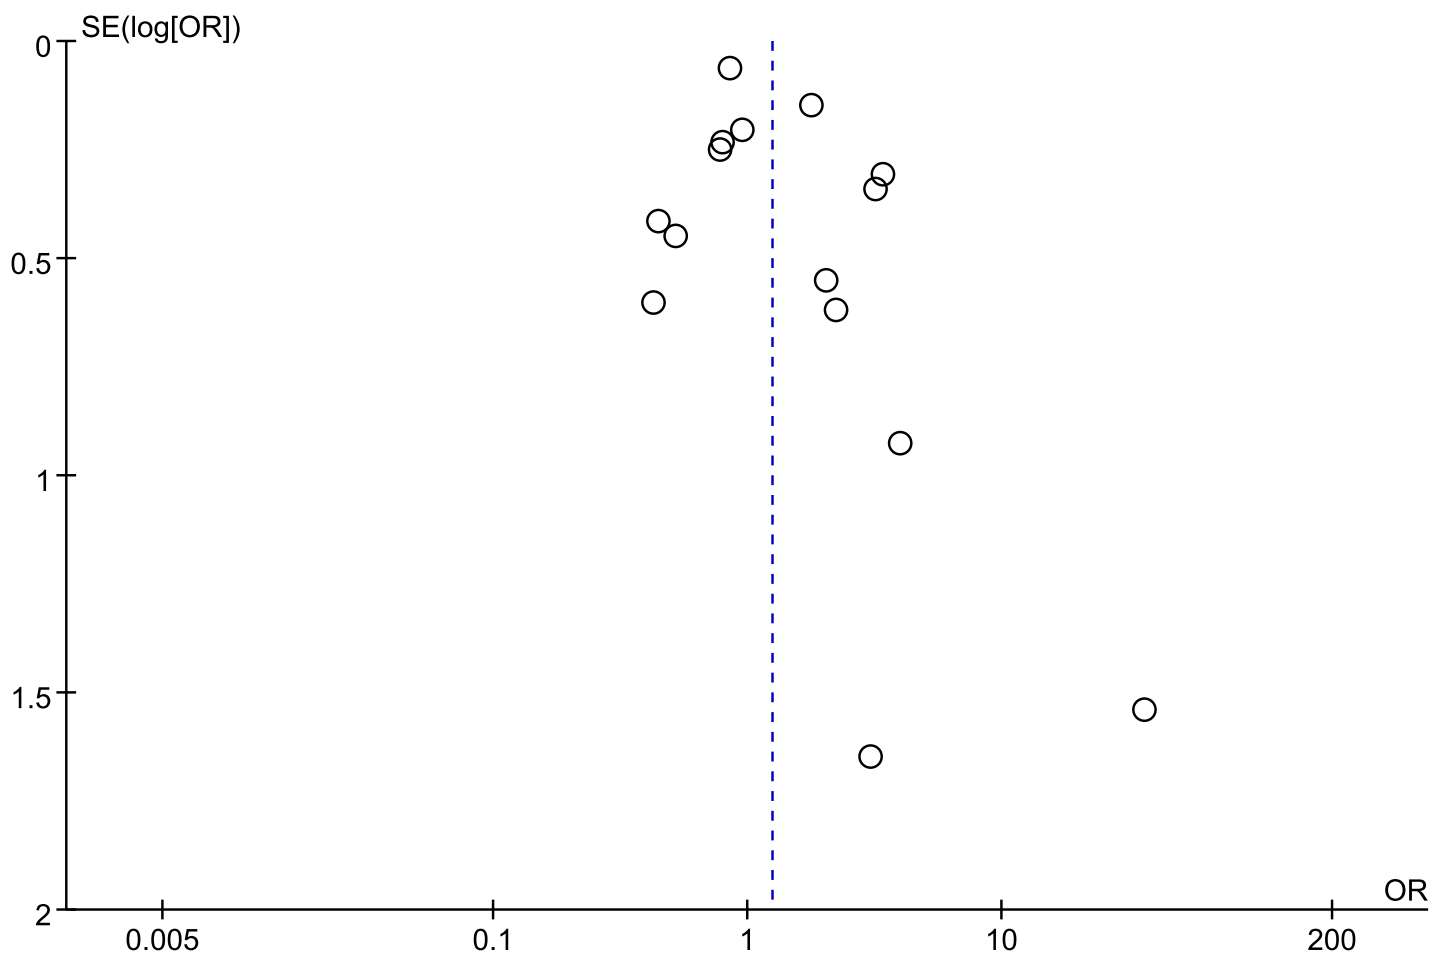

Supplement: pone.0249481.s001.pdf [file pone.0249481.s001.pdf]
