# Supplementary material for: The proportion and effect of corticosteroid therapy in patients with COVID-19 infection: A systematic review and meta-analysis
Source: PubMed Central journal article supplement (PMC8059814; doi:10.1371/journal.pone.0249481), 2021-04-21

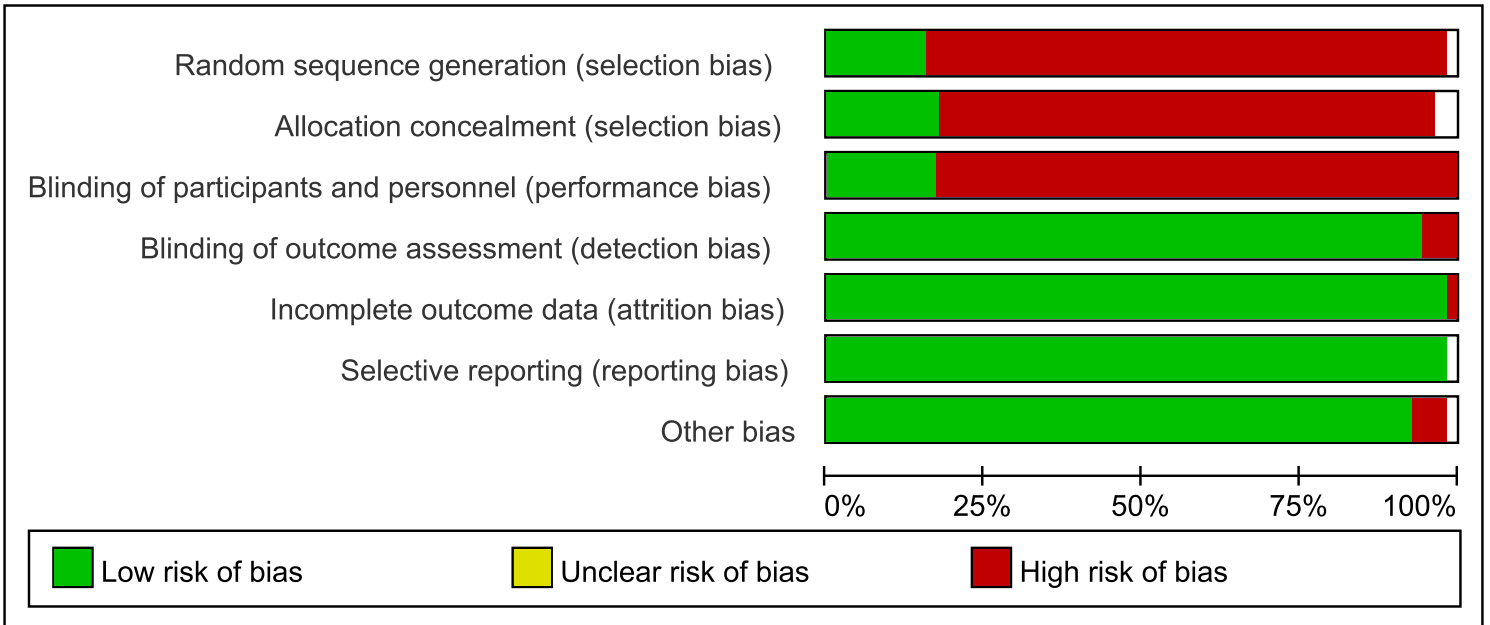

Supplement: pone.0249481.s005.pdf [file pone.0249481.s005.pdf]
