# Supplementary material for: The proportion and effect of corticosteroid therapy in patients with COVID-19 infection: A systematic review and meta-analysis
Source: PubMed Central journal article supplement (PMC8059814; doi:10.1371/journal.pone.0249481), 2021-04-21
Supplement: pone.0249481.s006.pdf [file pone.0249481.s006.pdf]

|                 | Random sequence generation (selection bias) | Allocation concealment (selection bias) | Blinding of participants and personnel (performance bias) | Blinding of outcome assessment (detection bias) | Incomplete outcome data (attrition bias) | Selective reporting (reporting bias) | Other bias |
|-----------------|---------------------------------------------|-----------------------------------------|-----------------------------------------------------------|-------------------------------------------------|------------------------------------------|--------------------------------------|------------|
| Angus D 2020    | +                                           | +                                       | +                                                         | +                                               | +                                        | +                                    | +          |
| Bai P 2020      | -                                           | -                                       | -                                                         | -                                               | +                                        | +                                    | +          |
| Bruno M 2020.   | +                                           | +                                       | +                                                         | +                                               | +                                        | +                                    | +          |
| Cao B 2020      | +                                           | +                                       | +                                                         | +                                               | +                                        | +                                    | +          |
| Cao J 2020      | -                                           | -                                       | -                                                         | +                                               | +                                        | +                                    | +          |
| Chen N 2020     | -                                           | -                                       | -                                                         | +                                               | +                                        | +                                    | +          |
| Chen T 2020     | -                                           | -                                       | -                                                         | +                                               | +                                        | +                                    | +          |
| Deng Y 2020     | -                                           | -                                       | -                                                         | +                                               | +                                        | +                                    | +          |
| Dequin P 2020   | +                                           | +                                       | +                                                         | +                                               | +                                        | +                                    | +          |
| Ding Q 2020     | -                                           | -                                       | -                                                         | +                                               | -                                        | +                                    | -          |
| Du Y 2020       | -                                           | -                                       | -                                                         | +                                               | +                                        | +                                    | +          |
| Emmi G 2020     | -                                           | -                                       | -                                                         | +                                               | +                                        | +                                    | +          |
| Fang X 2020     | -                                           | -                                       | -                                                         | +                                               | +                                        | +                                    | +          |
| Gao T 2020      | -                                           | -                                       | -                                                         | +                                               | +                                        | +                                    | +          |
| Guan W 2020     | -                                           | -                                       | -                                                         | +                                               | +                                        | +                                    | +          |
| Guo T 2020      | -                                           | -                                       | -                                                         | +                                               | +                                        | +                                    | +          |
| Han Y 2020      | -                                           | -                                       | -                                                         | +                                               | +                                        | +                                    | -          |
| Hong K 2020     | -                                           | -                                       | -                                                         | +                                               | +                                        | +                                    | +          |
| Huang C 2020    |                                             | +                                       | +                                                         | +                                               | +                                        | +                                    | +          |
| Huang Q 2020    | -                                           | -                                       | -                                                         | +                                               | +                                        | +                                    | +          |
| Jacobs J 2020   | -                                           | -                                       | -                                                         | +                                               | +                                        | +                                    | +          |
| Jeronimo C 2020 | +                                           | +                                       | +                                                         | +                                               | +                                        | +                                    | +          |
| Lian J 2020     | -                                           | -                                       | -                                                         | +                                               | +                                        | +                                    | +          |
| Lian JS 2020    | -                                           | -                                       | -                                                         | +                                               | +                                        | +                                    | +          |
| Ling Y 2020     | -                                           | -                                       | -                                                         | +                                               | +                                        | +                                    | +          |
| Li Q 2020       | -                                           |                                         | -                                                         | -                                               | +                                        | +                                    |            |
| Li R 2020       | -                                           | -                                       | -                                                         | +                                               | +                                        | +                                    | +          |
| Liu J 2020      | -                                           |                                         | -                                                         | -                                               | +                                        |                                      | +          |
| Li X 2020       | -                                           | -                                       | -                                                         | +                                               | +                                        | +                                    | +          |
| Luo P 2020      | -                                           | -                                       | -                                                         | +                                               | +                                        | +                                    | +          |
| Mo P 2020       | -                                           | -                                       | -                                                         | +                                               | +                                        | +                                    | +          |
| Ni Q 2020       | -                                           | -                                       | -                                                         | +                                               | +                                        | +                                    | +          |
| Pang X 2020     | -                                           | -                                       | -                                                         | +                                               | +                                        | +                                    | +          |
| Petersen M 2020 | +                                           | +                                       | +                                                         | +                                               | +                                        | +                                    | +          |
| Peter W 2020    | +                                           | +                                       | +                                                         | +                                               | +                                        | +                                    | +          |
| Qiu C 2020      | -                                           | -                                       | -                                                         | +                                               | +                                        | +                                    | +          |
| Shen Q 2020     | -                                           | -                                       | -                                                         | +                                               | +                                        | +                                    | -          |
| Sun L 2020      | -                                           | -                                       | -                                                         | +                                               | +                                        | +                                    | +          |
| Wang D 2020     | -                                           | -                                       | -                                                         | +                                               | +                                        | +                                    | +          |
| Wang L 2020     | -                                           | -                                       | -                                                         | +                                               | +                                        | +                                    | +          |
| Wang Y 2020     | -                                           | -                                       | -                                                         | +                                               | +                                        | +                                    | +          |
| Wang YM 2020    | +                                           | +                                       | +                                                         | +                                               | +                                        | +                                    | +          |
| Wan S 2020      | -                                           | -                                       | -                                                         | +                                               | +                                        | +                                    | +          |
| Wu C 2020       | -                                           | -                                       | -                                                         | +                                               | +                                        | +                                    | +          |
| Xu K 2020       | -                                           | -                                       | -                                                         | +                                               | +                                        | +                                    | +          |
| Yang W 2020     | -                                           | -                                       | -                                                         | +                                               | +                                        | +                                    | +          |
| Yang X 2020     | -                                           | -                                       | -                                                         | +                                               | +                                        | +                                    | +          |
| Zha L 2020      | -                                           | -                                       | -                                                         | +                                               | +                                        | +                                    | +          |
| Zhang Y 2020    | -                                           | -                                       | -                                                         | +                                               | +                                        | +                                    | +          |
| Zhao X 2020     | -                                           | -                                       | -                                                         | +                                               | +                                        | +                                    | +          |
| Zheng F 2020    | -                                           | -                                       | -                                                         | +                                               | +                                        | +                                    | +          |
| Zhou F 2020     | -                                           | -                                       | -                                                         | +                                               | +                                        | +                                    | +          |

Red plus high risk Yellow plus low risk White blank unclear
